# Supplementary material
Source: publisher site journal article supplement (https://static.cambridge.org/content/id/urn:cambridge.org:id:article:S0007114520001610/resource/name/S0007114520001610supp001.doc)
Supplement: Supplementary file 1 [file S0007114520001610supp001.doc]

| **Section/topic** | **#** | **Checklist item** | **Reported on page #** |
| --- | --- | --- | --- |
| **TITLE** | | |  |
| Title | 1 | the report Identify as a meta-analysis | 1 |
| **ABSTRACT** | | |  |
| Structured summary | 2 | The structured abstract included background, objective, methods, results and conclusions. | 2 |
| **INTRODUCTION** | | |  |
| Rationale | 3 | Described in the introduction | 2 |
| Objectives | 4 | Stated in the introduction | 2-3 |
| **METHODS** | | |  |
| Protocol and registration | 5 | The protocol is described in the methods, Registration does not apply. | 4 |
| Eligibility criteria | 6 | Described in the methods. | 4 |
| Information sources | 7 | Described in the methods. | 4 |
| Search | 8 | Described in the methods. | 4 |
| Study selection | 9 | Described in the methods. | 4 |
| Data collection process | 10 | Described in the methods. | 5 |
| Data items | 11 | Described in the methods. | 5 |
| Risk of bias in individual studies | 12 | Described in the methods. | 5 |
| Summary measures | 13 | Described in the methods. | 5 |
| Synthesis of results | 14 | Described in the methods. | 5-6 |

Page 1 of 2

| **Section/topic** | **#** | **Checklist item** | **Reported on page #** |
| --- | --- | --- | --- |
| Risk of bias across studies | 15 | Described in the methods. | 6 |
| Additional analyses | 16 | Described in the methods. | 6 |
| **RESULTS** | | |  |
| Study selection | 17 | Described in the results. | 6 |
| Study characteristics | 18 | Described in the results. | 6-7 |
| Risk of bias within studies | 19 | Described in the table 2. | 23 |
| Results of individual studies | 20 | Described in the table 3. | 26 |
| Synthesis of results | 21 | Described in the results. | 7-8 |
| Risk of bias across studies | 22 | Described in the methods. | 6 |
| Additional analysis | 23 | Described in the methods. | 8 |
| **DISCUSSION** | | |  |
| Summary of evidence | 24 | Described in the discussion. | 9-11 |
| Limitations | 25 | Described in the discussion. | 11 |
| Conclusions | 26 | Described in the discussion. | 12 |
| **FUNDING** | | |  |
| Funding | 27 | Described inFinancial Support | 12 |

*From:*  Moher D, Liberati A, Tetzlaff J, Altman DG, The PRISMA Group (2009). Preferred Reporting Items for Systematic Reviews and Meta-Analyses: The PRISMA Statement. PLoS Med 6(7): e1000097. doi:10.1371/journal.pmed1000097

For more information, visit: **www.prisma-statement.org**.

Page 2 of 2
